# Supplementary material for: The Rice ILI2 Locus Is a Bidirectional Target of the African Xanthomonas oryzae pv. oryzae Major Transcription Activator-like Effector TalC but Does Not Contribute to Disease Susceptibility
Source: MDPI journal article supplement (doi:10.3390/ijms23105559), 2022-05-16
Supplement: s1 [file s1]

**Table S1: List of plasmids used in this study.**

| Plasmid ID | Description                                                                                                                                              | References |
|------------|----------------------------------------------------------------------------------------------------------------------------------------------------------|------------|
| pHD40      | A modified pH-Ubi-cas9-7 with a castor bean catalase intron in the hpt gene expressing gRNAs 01 and 02 of Figure S4.                                     | This study |
| pHD46      | A pENTR4:gRNA4-based Gateway entry vector for cloning and expression of two gRNA units with flanking EcoRI-XbaI restriction sites.                       | This study |
| pHD56      | As pHD40 but for expression of gRNAs 01, 02, 03 and 04 of Figure S4.                                                                                     | This study |
| pHD57      | As pHD40 but for expression of gRNAs 01, 02, 05 and 06 of Figure S4.                                                                                     | This study |
| pHD61      | As pHD40 but for expression of gRNAs 07 and 08 of Figure S4.                                                                                             | This study |
| pSKX1      | A Golden Gate-compatible pBBR1MCS-5 derivative with a lac promoter for insert transcription and the FLAG epitope coding sequence for C-terminal fusions. | [26]       |
| pTalC      | pSKX1 plasmid with the <i>talC</i> gene from the burkinabe strain BAI3                                                                                   | [26, 31]   |
| pTalF      | pSKX1 plasmid with the <i>talF</i> gene from the malian strain MAI1                                                                                      | [26, 31]   |
| pHD62      | SKX1 plasmid with ArtTale1 (Figure S3) coding sequences                                                                                                  | This study |
| pHD65      | SKX1 plasmid with ArtTale4 (Figure S3) coding sequences                                                                                                  | This study |
| pHD66      | SKX1 plasmid with ArtTale5 (Figure S3) coding sequences                                                                                                  | This study |
| pHD67      | SKX1 plasmid with ArtTale6 (Figure S3) coding sequences                                                                                                  | This study |
