# Supplementary material for: The Rice ILI2 Locus Is a Bidirectional Target of the African Xanthomonas oryzae pv. oryzae Major Transcription Activator-like Effector TalC but Does Not Contribute to Disease Susceptibility
Source: MDPI journal article supplement (doi:10.3390/ijms23105559), 2022-05-16
Supplement: s1 [file s1]

**Table S2: List of *Xanthomonas oryzae* strains used in this study.**

| Designation    | Strain ID | Description                                                                                                                                                | References |
|----------------|-----------|------------------------------------------------------------------------------------------------------------------------------------------------------------|------------|
| BAI3           | CIX151    | A rifampicin resistant and fully virulent derivative of the BAI3 wild type Xoo strain from Burkina Faso                                                    | [33]       |
| BAI3H          | CIX3878   | CIX151 deleted for a portion of the <i>hrcC</i> gene                                                                                                       | [31]       |
| BAI3.1.1       | CIX531    | This strain is also referred to as BAI3 <sup>R</sup> $\Delta$ <i>talC</i> . Corresponds to CIX151 with a suicide plasmid insertion in <i>talC</i> (3,7kb). | [31]       |
| BAI3.1.1_pEV   | CIX2533   | CIX531 carrying the empty pSKX1 plasmid                                                                                                                    | [26]       |
| BAI3.1.1_pTalC | CIX2529   | CIX531 carrying pSKX1plasmid containing the <i>talC</i> gene from strain BAI3                                                                              | [26]       |
| ME2            | CIX4497   | PXO99 <sup>A</sup> derivative with a knockout mutation in <i>pthXo1</i>                                                                                    | [42]       |
| ME2_EV         | CIX4498   | CIX4497 carrying the empty pSKX1 plasmid                                                                                                                   | This study |
| ME2_pTALC      | CIX4499   | CIX4497 carrying pSKX1plasmid containing the <i>talC</i> gene from strain BAI3                                                                             | This study |
| ME2_pTALF      | CIX4500   | CIX4497 carrying pSKX1plasmid containing the <i>talF</i> gene from strain MAI1                                                                             | This study |
| ME2_pArTAL01   | CIX4501   | CIX4497 carrying the pHD62 plasmid                                                                                                                         | This study |
| ME2_pArTAL04   | CIX4502   | CIX4497 carrying the pHD65 plasmid                                                                                                                         | This study |
| ME2_pArTAL05   | CIX4503   | CIX4497 carrying the pHD66 plasmid                                                                                                                         | This study |
| ME2_pArTAL06   | CIX4504   | CIX4497 carrying the pHD67 plasmid                                                                                                                         | This study |
