# Supplementary material for: The Rice ILI2 Locus Is a Bidirectional Target of the African Xanthomonas oryzae pv. oryzae Major Transcription Activator-like Effector TalC but Does Not Contribute to Disease Susceptibility
Source: MDPI journal article supplement (doi:10.3390/ijms23105559), 2022-05-16
Supplement: s1 [file s1]

A

| ArTALE Name | RVD sequence                                          | Target DNA sequence  | Downstream Target Transcript |
|-------------|-------------------------------------------------------|----------------------|------------------------------|
| Art-TALE1   | HD-HD-NG-NK-NI-HD-NG-NI-NI-HD-NI-HD-NG-NG-NG-NI-NI-HD | T CCTGACTAACACTTTAAC | ATAC2 / ILI2                 |
| Art-TALE4   | NN-HD-NI-NG-NN-NG-HD-NG-HD-NG-NI-NG-HD-NI-HD-HD-NN-NG | T GCATGTCTCTATCACCGT | ATAC2 / ILI2                 |
| Art-TALE5   | NI-NN-HD-NG-NI-NH-HD-NI-NI-HD-NI-NI-NG-NI-NI-NG-NI    | T AGCTAGCAACAATAAATA | ATAC1                        |
| Art-TALE6   | HD-NG-HD-NI-HD-NI-HD-NN-NN-NG-NG-NI-NI-NI-NN-NG-NN-NG | T CTCACACGGTTAAAGTGT | ATAC1                        |

B

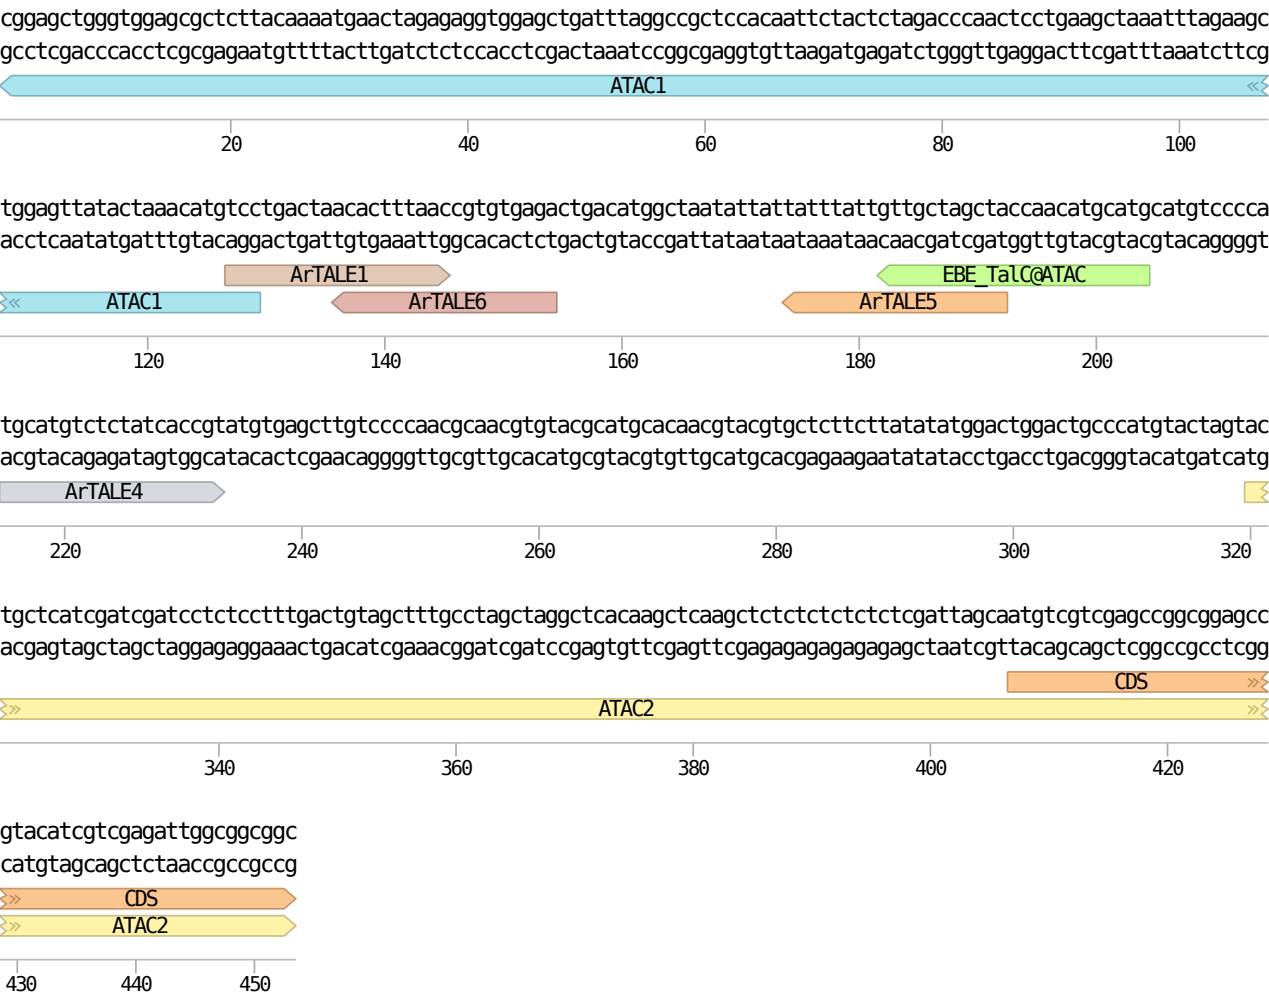

Figure S3
