# Supplementary material for: The Rice ILI2 Locus Is a Bidirectional Target of the African Xanthomonas oryzae pv. oryzae Major Transcription Activator-like Effector TalC but Does Not Contribute to Disease Susceptibility
Source: MDPI journal article supplement (doi:10.3390/ijms23105559), 2022-05-16
Supplement: s1 [file s1]

OssWEET14 - LOC\_os11g31190

|                   | Ta1C_EBE                     | AvrXa7_EBE                       | Ta15_EBE                               |       |
|-------------------|------------------------------|----------------------------------|----------------------------------------|-------|
| <b>SWEET14p</b>   | gggcatgcatgtcagcagctgggtcat  | //atataaacccctccaaccaggt-gc      | taagctcatcaagccttcaagcaaaagcaaa        | WT    |
| sweet14-36        | gggcatgcatgtc-----           | //-----                          | -----agcaaaagcaaa                      | -93   |
| sweet14-37        | -----                        | //atataaacccctccaaccaggt-----    | -----tcacatcaagccttcaagcaaaagcaaa      | -51-7 |
| sweet14-38 atac-1 | gggcatgcatgtcag-----gggtcat  | //atataaacccctccaacca-----       | -----aagctcatcaagccttcaagcaaaagcaaa    | -5-6  |
| sweet14-39 atac-2 | gggcatgcatgtcagc-----tggtcat | //atataaacccctccaaccaggt-gc----- | -----tcacatcaagccttcaagcaaaagcaaa      | -3-5  |
| sweet14-41 atac-4 | g-----agctgggtcat            | //atataaacccctccaaccaggtg        | gtaagctcatcaagccttcaagcaaaagcaaa       | -15+1 |
| sweet14-42 atac-5 | gggcatgcatgtcagc-----        | //-----                          | -----gctaagctcatcaagccttcaagcaaaagcaaa | -69   |
| atac6             | gggcatgcatgtcagcagctgggtcat  | //atataaacccctccaaccaggt-gc      | taagctcatcaagccttcaagcaaaagcaaa        | WT    |

ATAC1

|                   |                                        |    |                                               |      |
|-------------------|----------------------------------------|----|-----------------------------------------------|------|
| <b>ATAC1</b>      | tacaaccacaagatatctttatccttaaaactatacta | // | tttcagccccggagctgggtggagcgctctttacaaaatgaacta | WT   |
| sweet14-36        | tacaaccacaagatatctttatccttaaaactatacta | // | tttcagccccggagctgggtggagcgctctttacaaaatgaacta | WT   |
| sweet14-37        | tacaaccacaagatatctttatccttaaaactatacta | // | tttcagccccggagctgggtggagcgctctttacaaaatgaacta | WT   |
| sweet14-38 atac-1 | tacaaccacaa-----                       | // | -----agctgggtggagcgctctttacaaaatgaacta        | -100 |
| sweet14-39 atac-2 | tacaaccacaagatatctttatccttaaaactatacta | // | tttcagccccggagctgggtggagcgctctttacaaaatgaacta | WT   |
| sweet14-41 atac-4 | tacaaccacaagatatctttatccttaaaactatacta | // | tttcagccccggagctgggtggagcgctctttacaaaatgaacta | WT   |
| sweet14-42 atac-5 | tacaaccacaagatatctttatccttaaaactatacta | // | tttcagccccggagctgggtggagcgctctttacaaaatgaacta | WT   |
| atac6             | tacaaccacaagatatctttatccttaaaactatacta | // | tttcagccccggagctgggtggagcgctctttacaaaatgaacta | WT   |

ATAC2 - ILI2 - LOC\_os11g39000

|                       | Ta1C EBE                                  |                                                              |
|-----------------------|-------------------------------------------|--------------------------------------------------------------|
| <b>ATAC2 promoter</b> | tattgttgctagctaccaaca-tgcatg              | catgtccccatg-catgtctctatcaccgtagtgagcttgtccccaacgcaacgt WT   |
| sweet14-36            | tattgttgctagctaccaaca-tgcatg              | catgtccccatg-catgtctctatcaccgtagtgagcttgtccccaacgcaacgt WT   |
| sweet14-37            | tattgttgctagctaccaaca-tgcatg              | catgtccccatg-catgtctctatcaccgtagtgagcttgtccccaacgcaacgt WT   |
| sweet14-38 atac-1     | tattgttgctagctaccaaca-tgcatg              | catgtccccatg-catgtctctatcaccgtagtgagcttgtccccaacgcaacgt WT   |
| sweet14-39 atac-2     | tattgttgctagctaccaacaCtgcatg              | catgtccccatgCcatgtctctatcaccgtagtgagcttgtccccaacgcaacgt +1+1 |
| sweet14-41 atac-4     | tattgttgctagctaccaaca--gcatg              | catgtccccatgTcatgtctctatcaccgtagtgagcttgtccccaacgcaacgt -1+1 |
| sweet14-42 atac-5     | tattgttgctagctaccaaa-----                 | -----catgtctctatcaccgtagtgagcttgtccccaacgcaacgt -20          |
| atac6                 | ta-----                                   | ----- -1238                                                  |
| <b>ATAC2 CDS</b>      | atgtcgtcgagccggcggagccgtacatcgctcgagattgg | // cggcgcagatgtgcccgacctcatccgtagcctactcat WT                |
| sweet14-36            | atgtcgtcgagccggcggagccgtacatcgctcgagattgg | // cggcgcagatgtgcccgacctcatccgtagcctactcat WT                |
| sweet14-37            | atgtcgtcgagccggcggagccgtacatcgctcgagattgg | // cggcgcagatgtgcccgacctcatccgtagcctactcat WT                |
| sweet14-38 atac-1     | atgtcgtcgagccggcggagccgtacatcgctcgagattgg | // cggcgcagatgtgcccgacctcatccgtagcctactcat WT                |
| sweet14-39 atac-2     | atgtcgtcgagccggcggagccgtacatcgctcgagattgg | // cggcgcagatgtgcccgacctcatccgtagcctactcat WT                |
| sweet14-41 atac-4     | atgtcgtcgagccggcggagccgtacatcgctcgagattgg | // cggcgcagatgtgcccgacctcatccgtagcctactcat WT                |
| sweet14-42 atac-5     | atgtcgtcgagccggcggagccgtacatcgctcgagattgg | // cggcgcagatgtgcccgacctcatccgtagcctactcat WT                |
| atac6                 | -----                                     | // -----gcccgacctcatccgtagcctactcat -1238                    |

Figure S5
