# Supplementary material for: The Rice ILI2 Locus Is a Bidirectional Target of the African Xanthomonas oryzae pv. oryzae Major Transcription Activator-like Effector TalC but Does Not Contribute to Disease Susceptibility
Source: Int J Mol Sci. 2022 May 16;23(10):5559. doi: 10.3390/ijms23105559 (PMC9142087; doi:10.3390/ijms23105559)
Supplement: Supplementary file 1 [file ijms-23-05559-s001.zip]

Archive with 8 entries (8 files):
- Fig_S1.pdf
- Fig_S2.pdf
- Fig_S3.pdf
- Fig_S4.pdf
- Fig_S5.pdf
- Fig_Sup_Legends.pdf
- Supp_Table01_plasmids.pdf
- Supp_Table02_Strains.pdf
