# Supplementary figures and images for: The Rice ILI2 Locus Is a Bidirectional Target of the African Xanthomonas oryzae pv. oryzae Major Transcription Activator-like Effector TalC but Does Not Contribute to Disease Susceptibility
Source: MDPI journal article supplement (doi:10.3390/ijms23105559), 2022-05-16

LOC\_Os11g31190

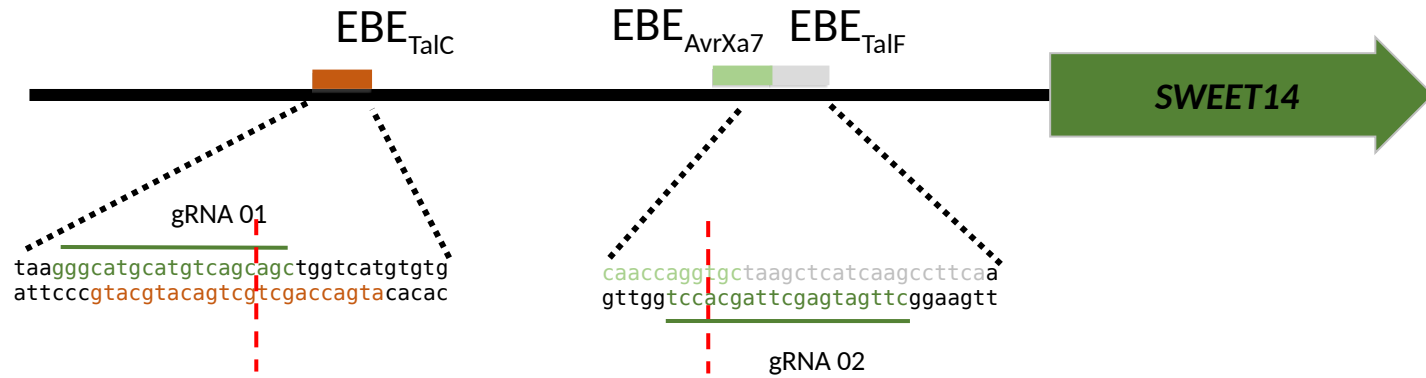

LOC\_Os11g39000

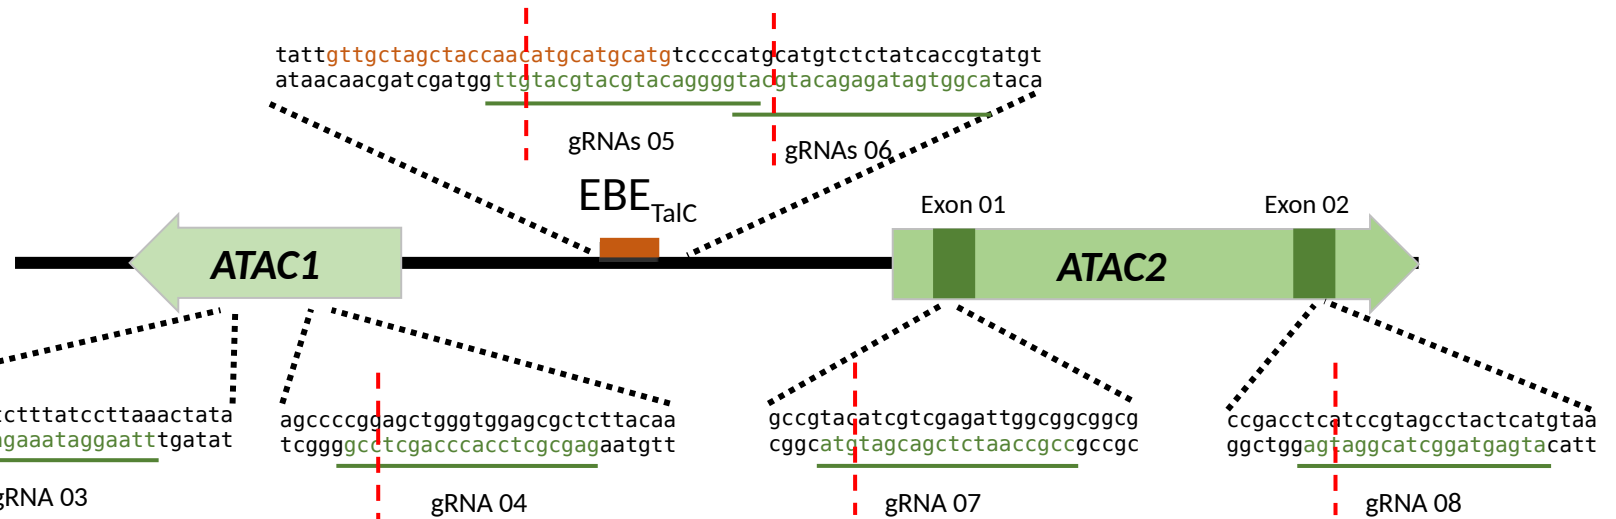

Figure S4

Supplement: s1 [file s1]

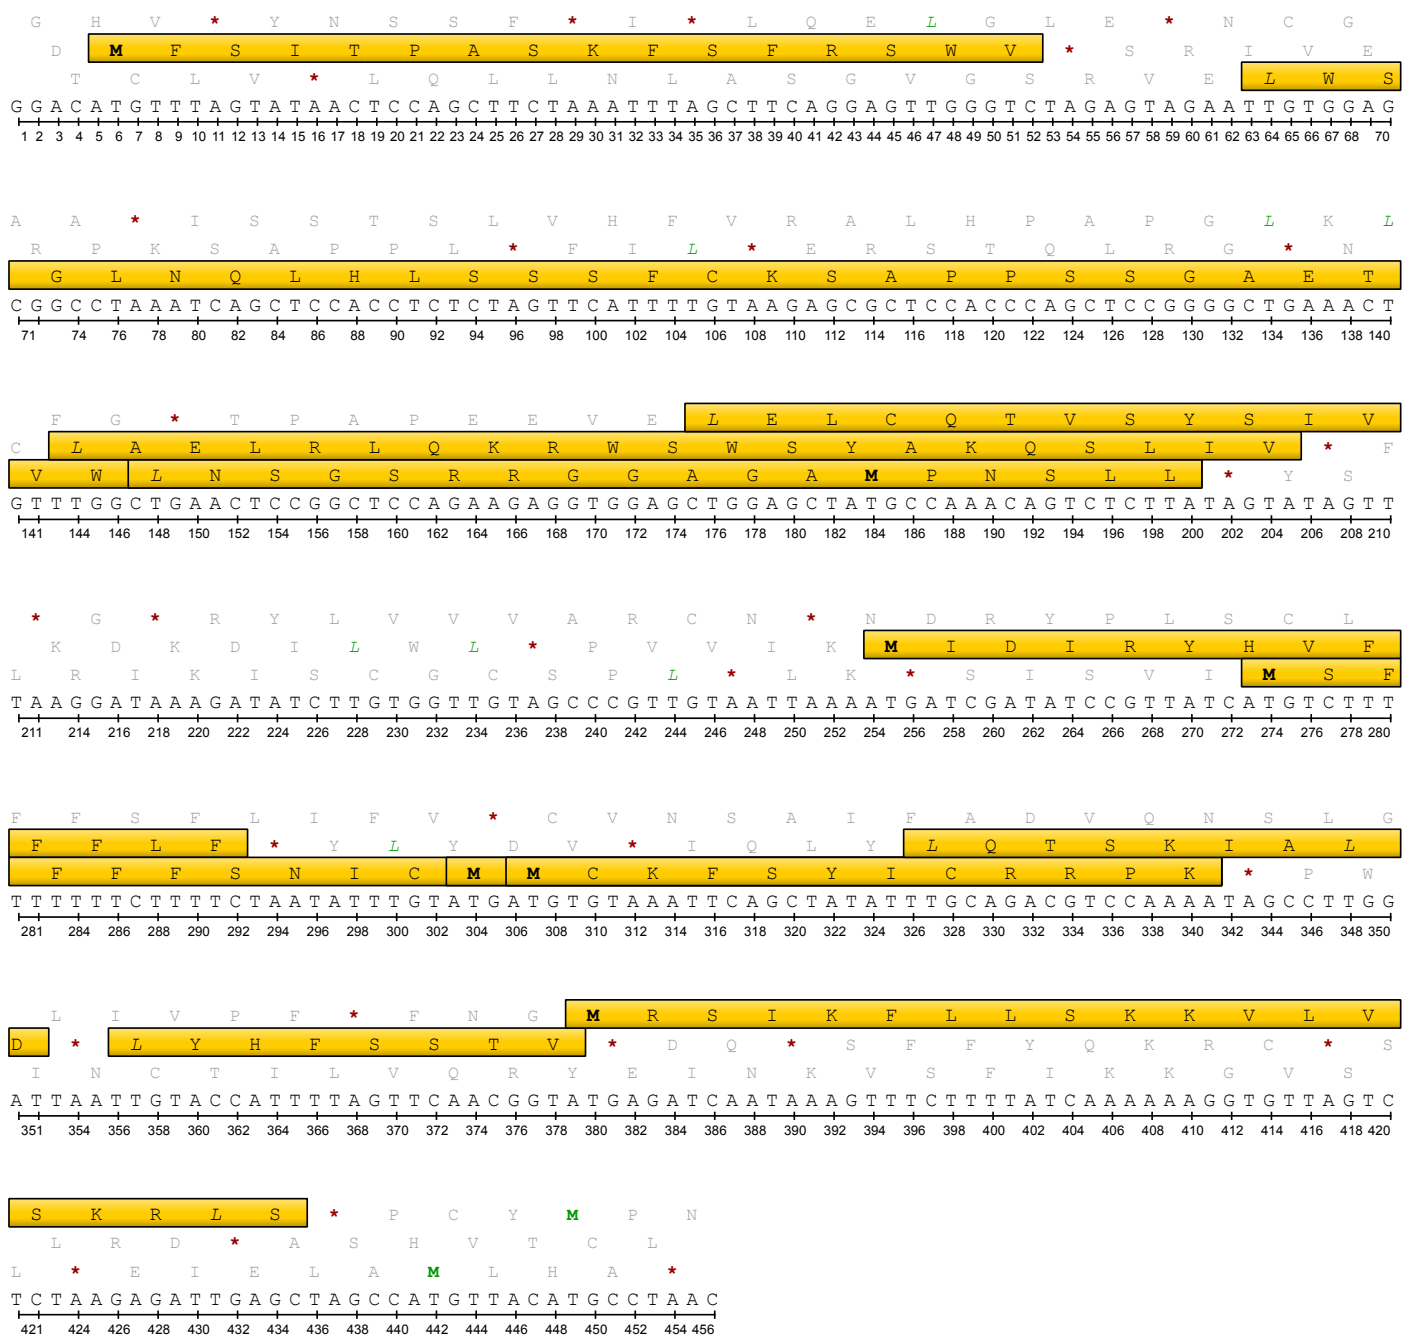

Figure S2

Supplement: s1 [file s1]

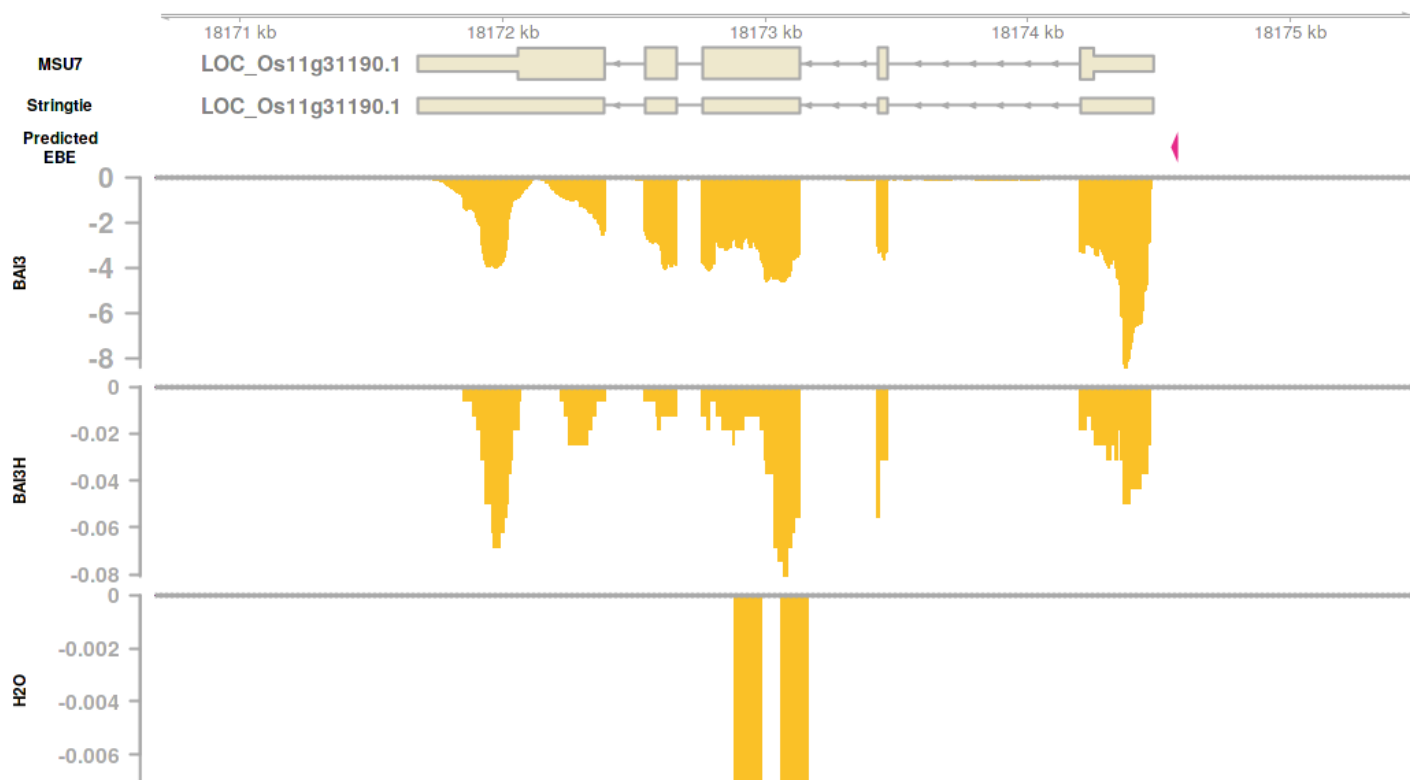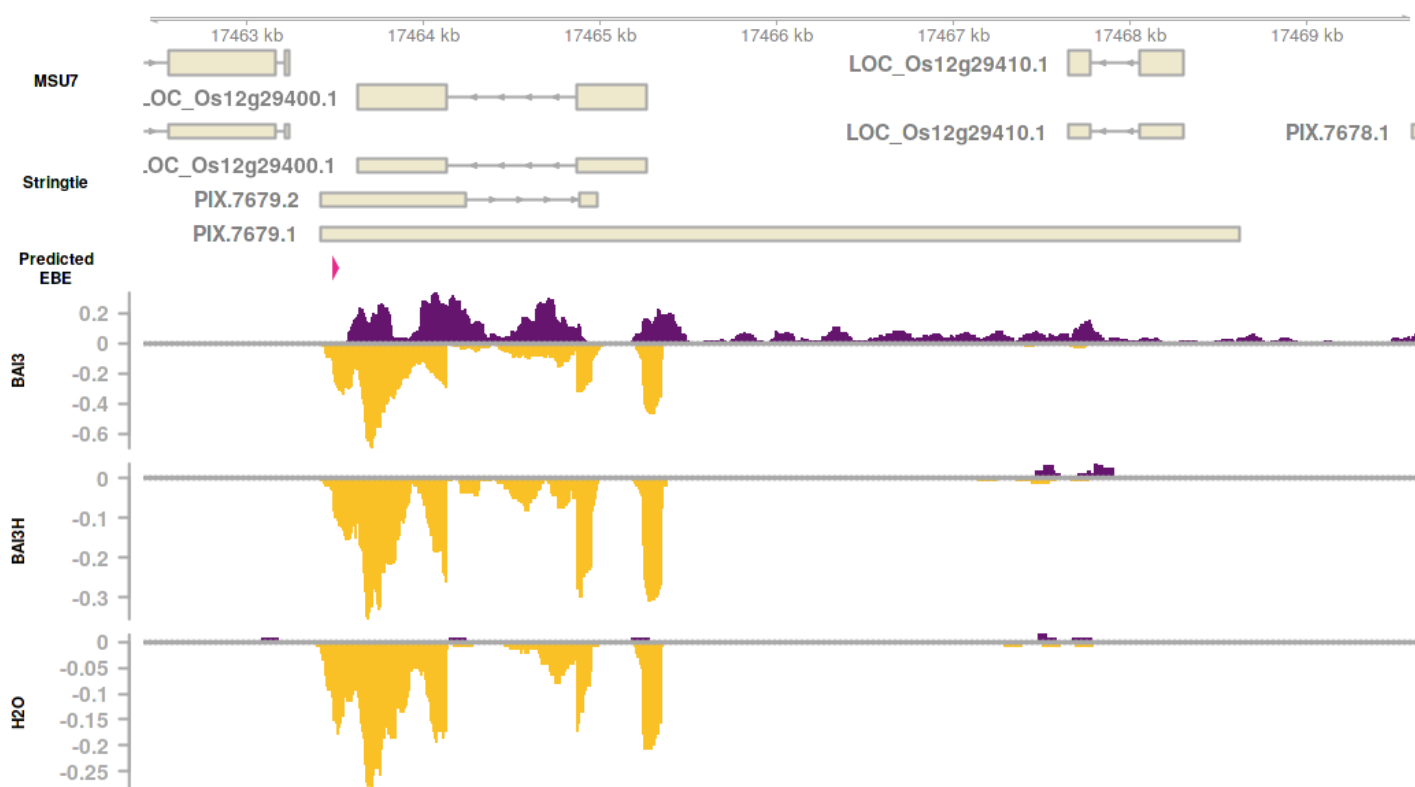

Fig S1 - Page 1

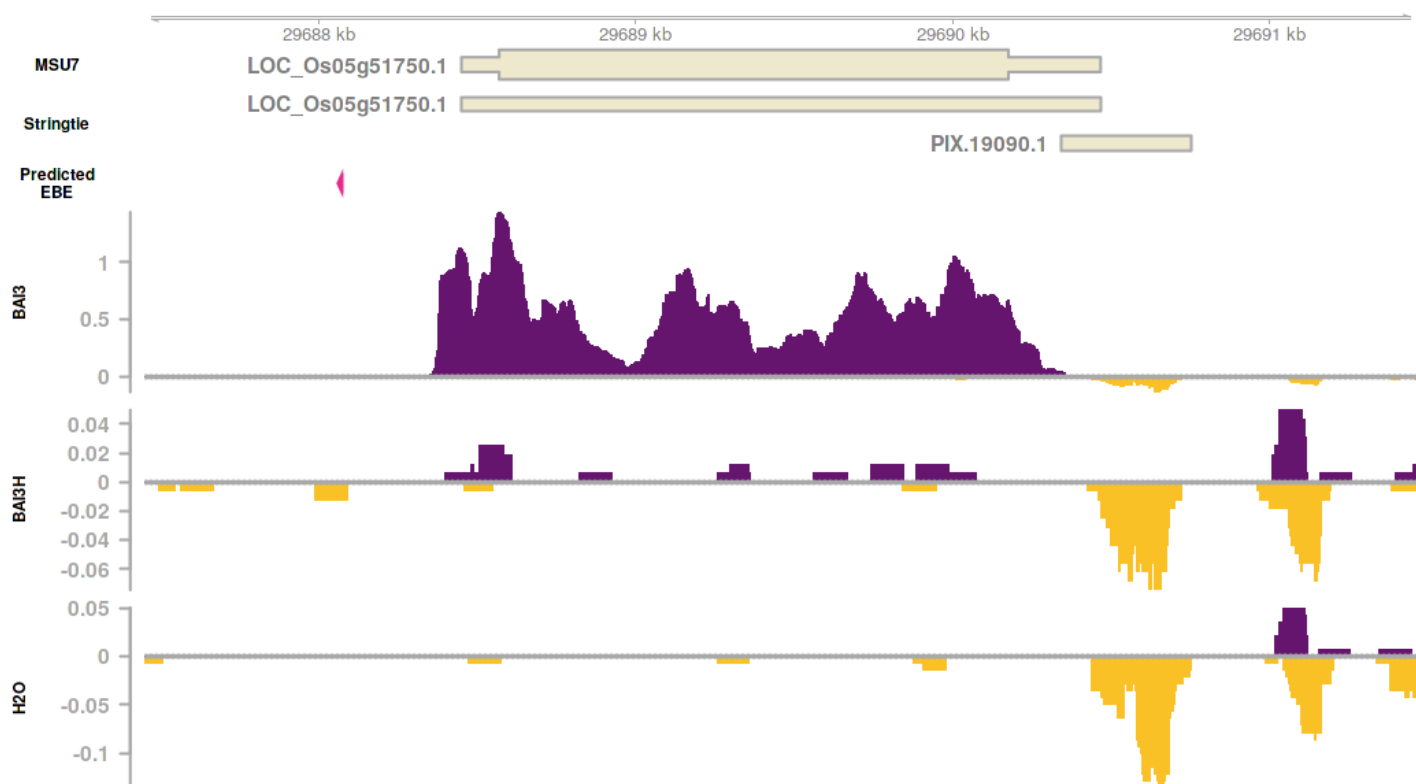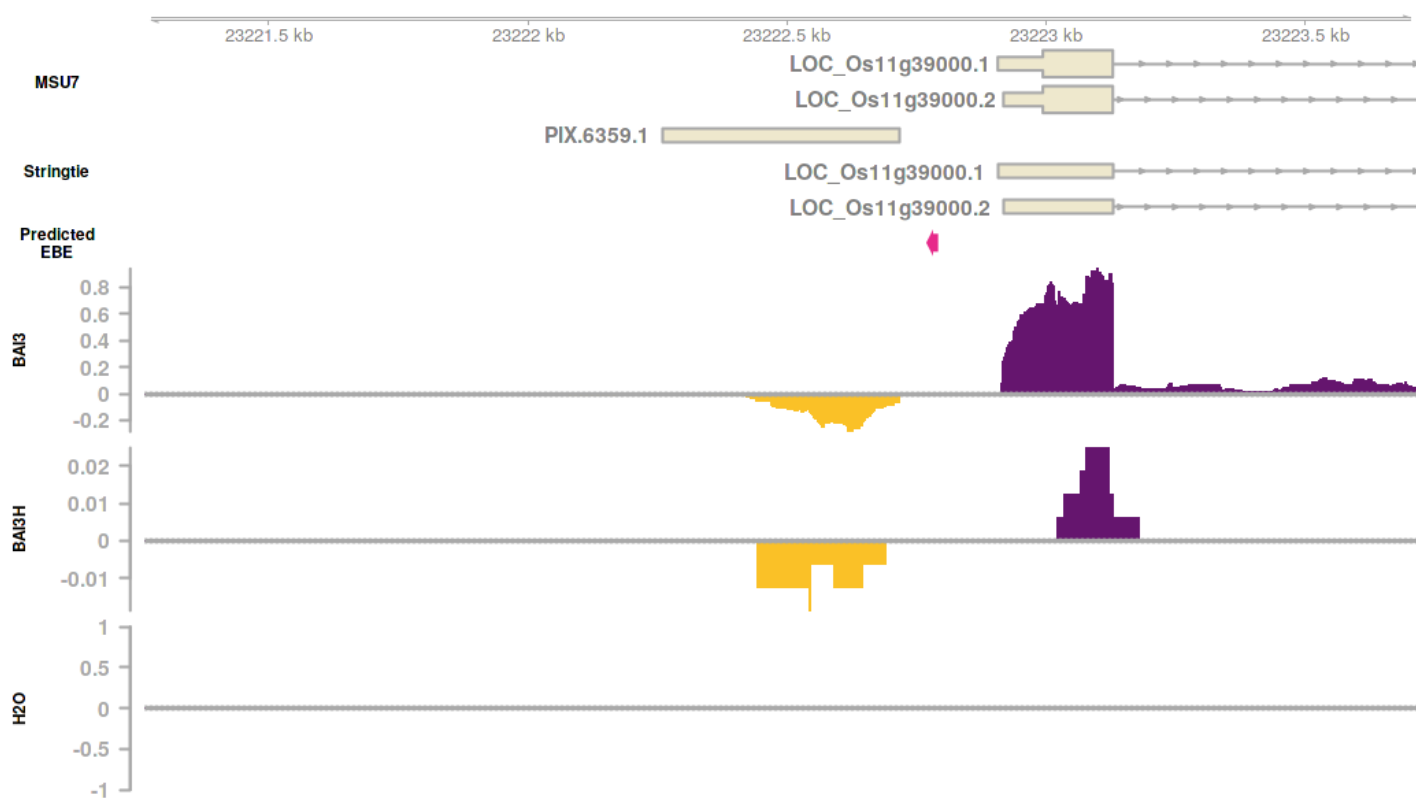

Fig S1 - Page 2

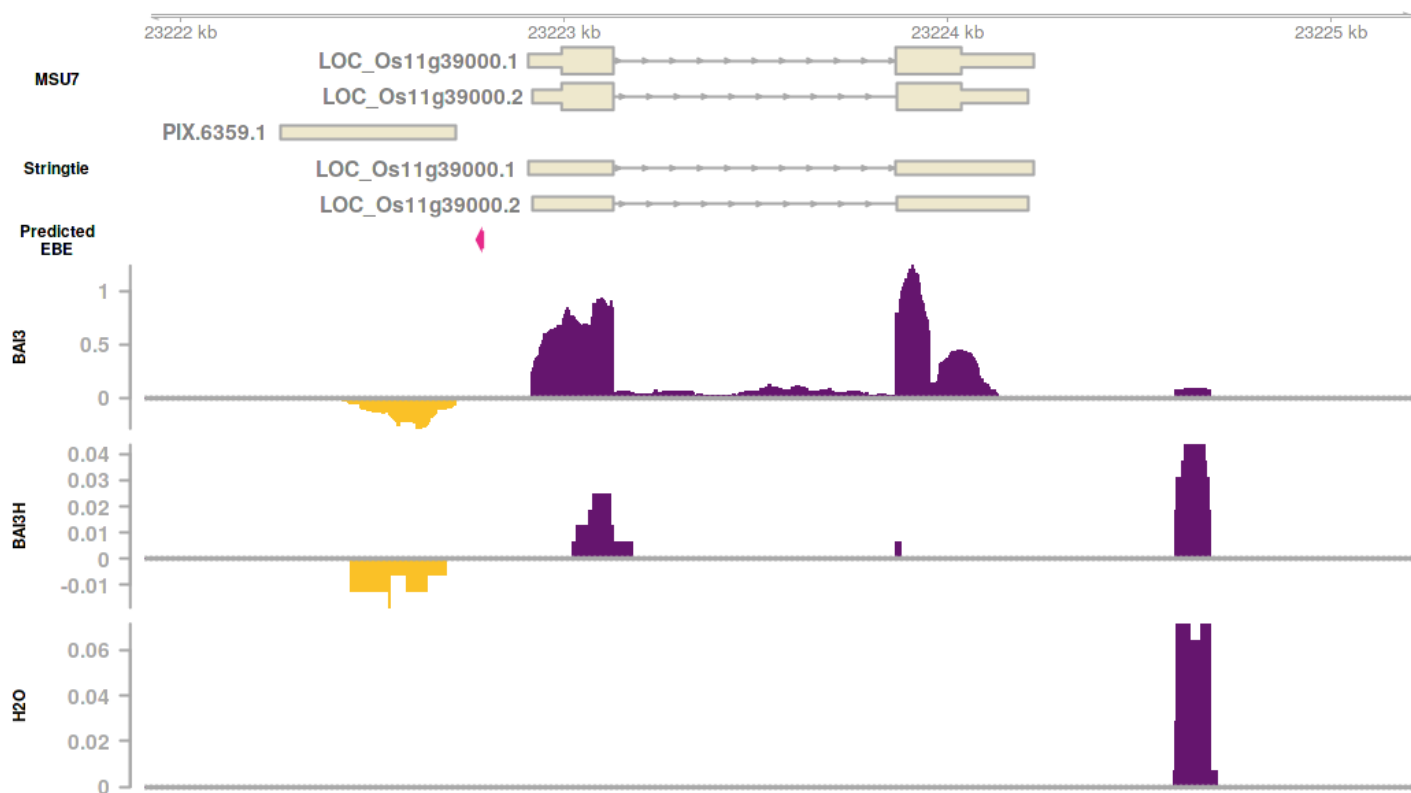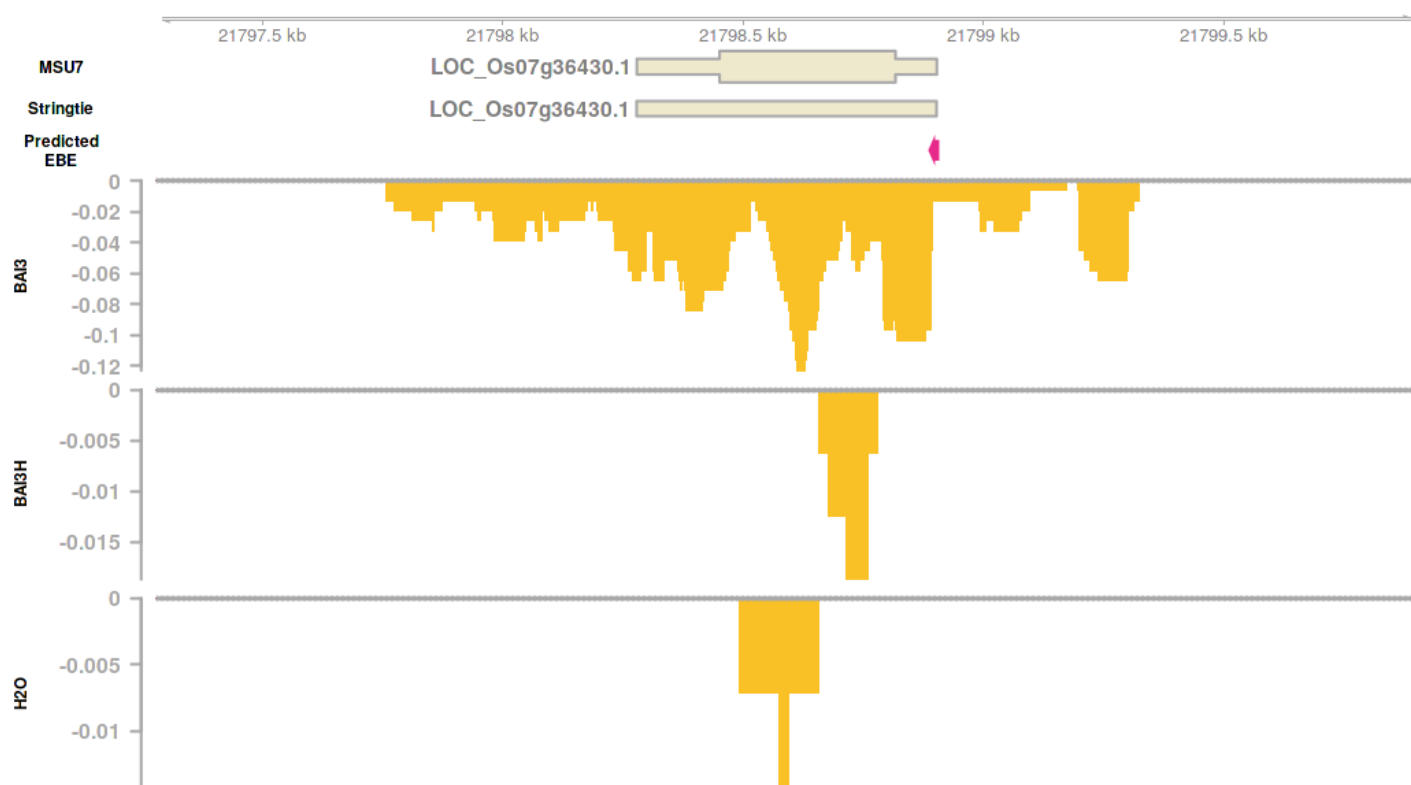

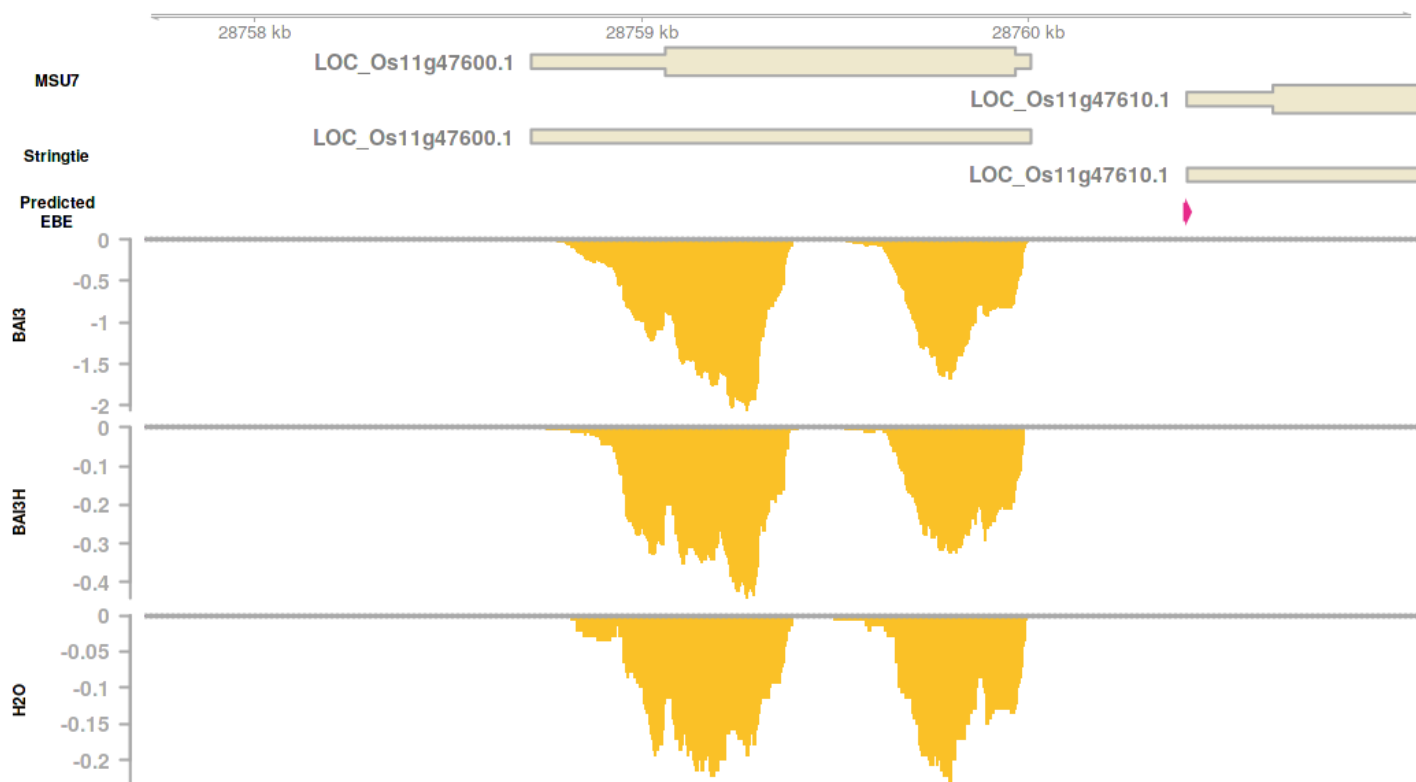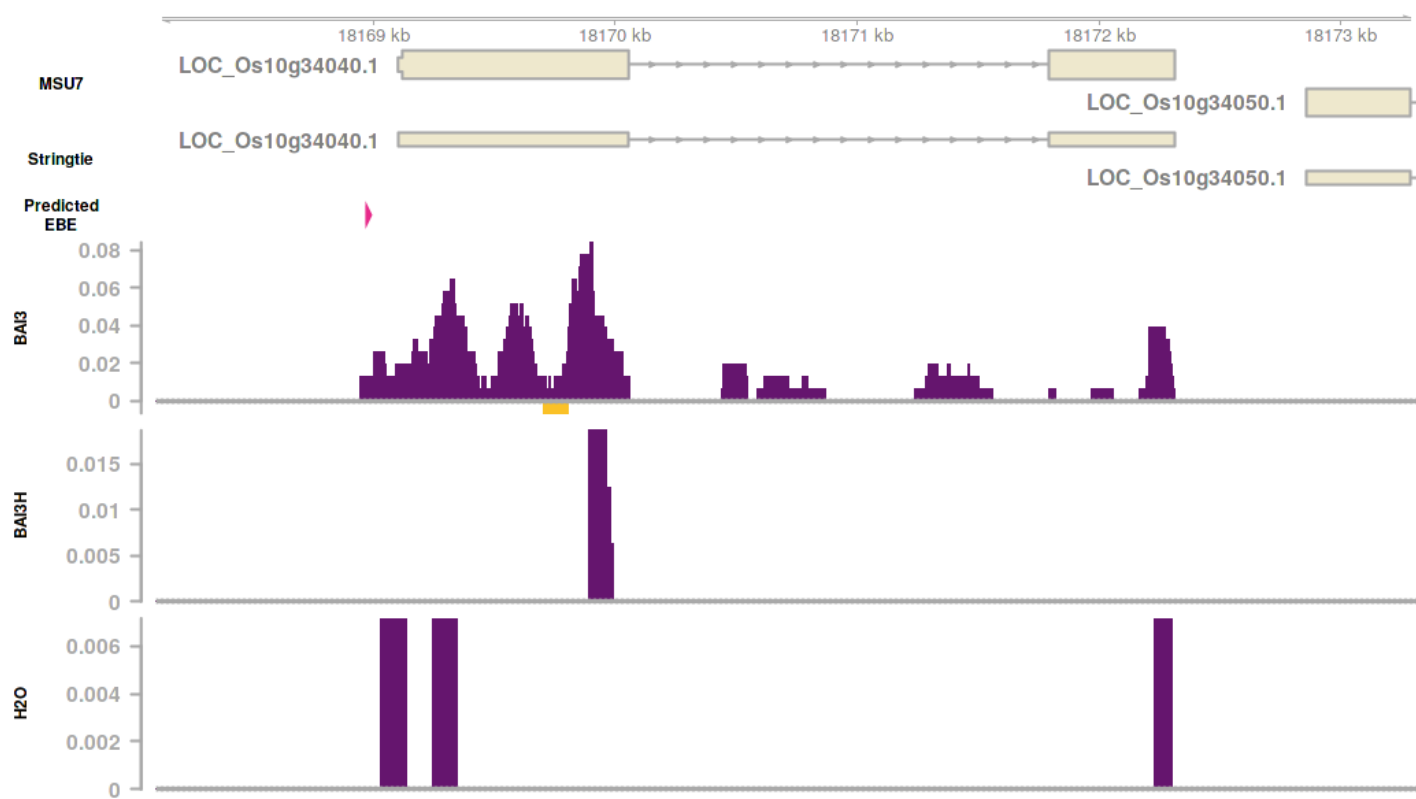

Fig S1 - Page 4

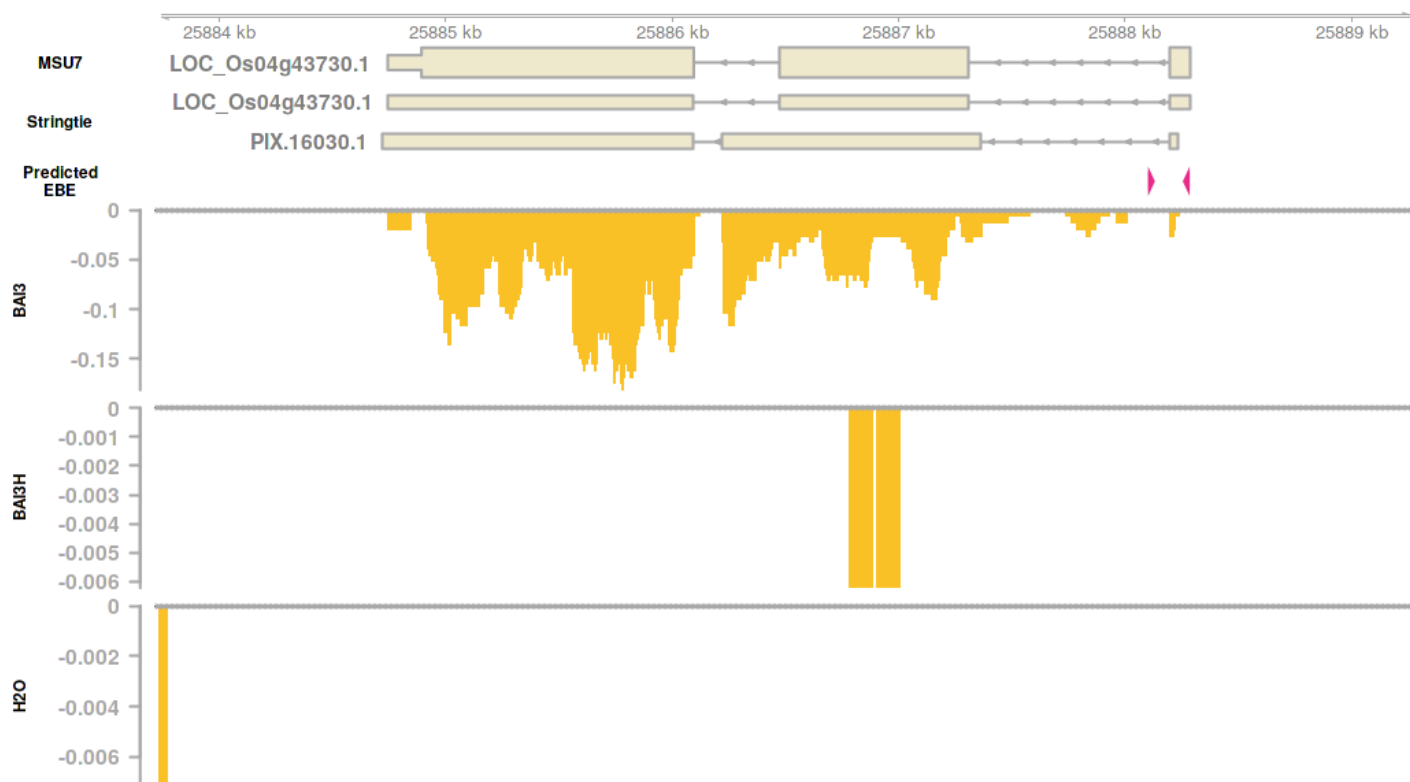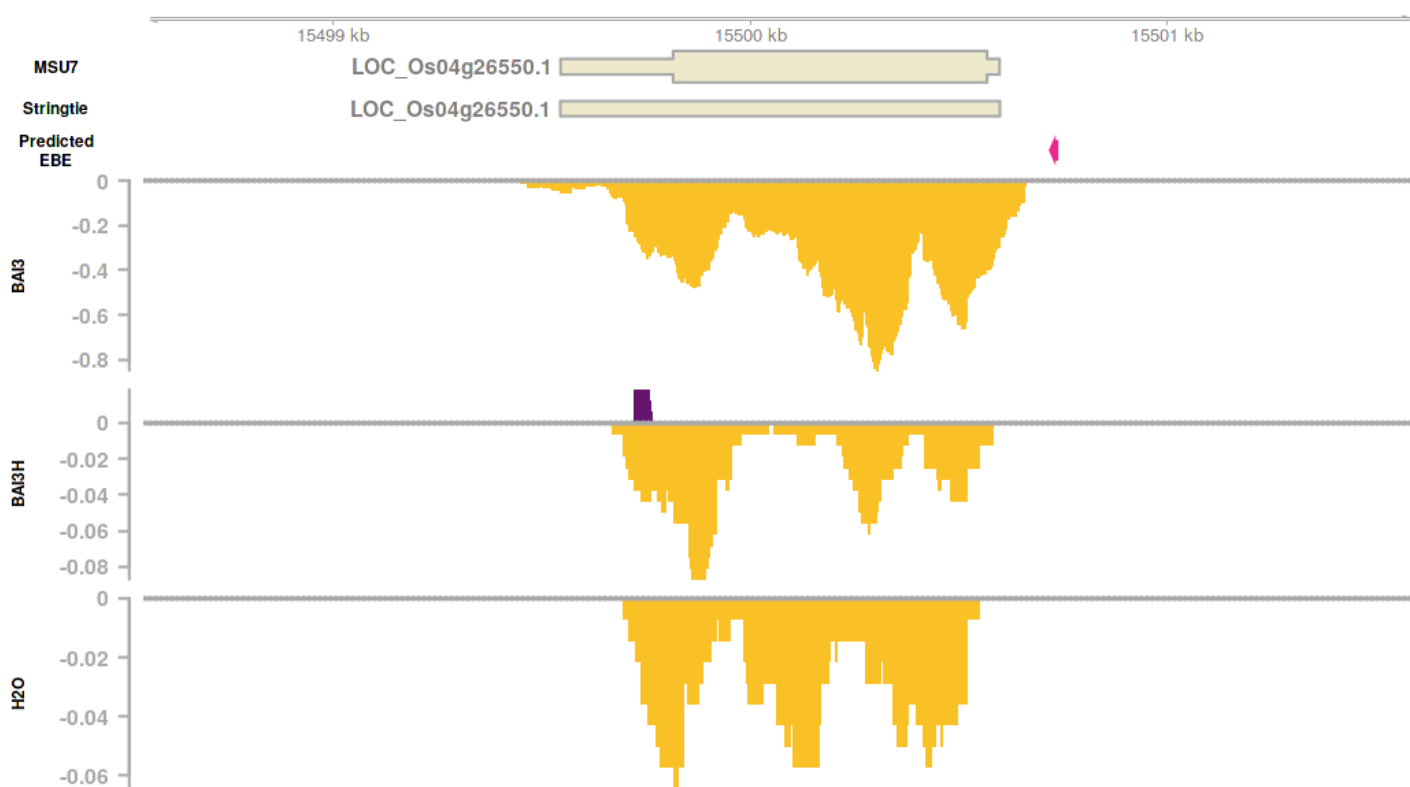

Fig S1 - Page 5

Supplement: s1 [file s1]
